# Supplementary material
Source: MDPI journal article supplement (https://www.mdpi.com/1999-4893/10/1/4)
Supplement: s1 [file s1]

# Supplementary Materials: Dependent Shrink of Transitions for Calculating Firing Frequencies in Signaling Pathway Petri Net Model

Atsushi Mizuta, Qi-Wei Ge and Hiroshi Matsuno

Inventory of Supplementary Information

Supplementary Figures: Figures S1–S5.

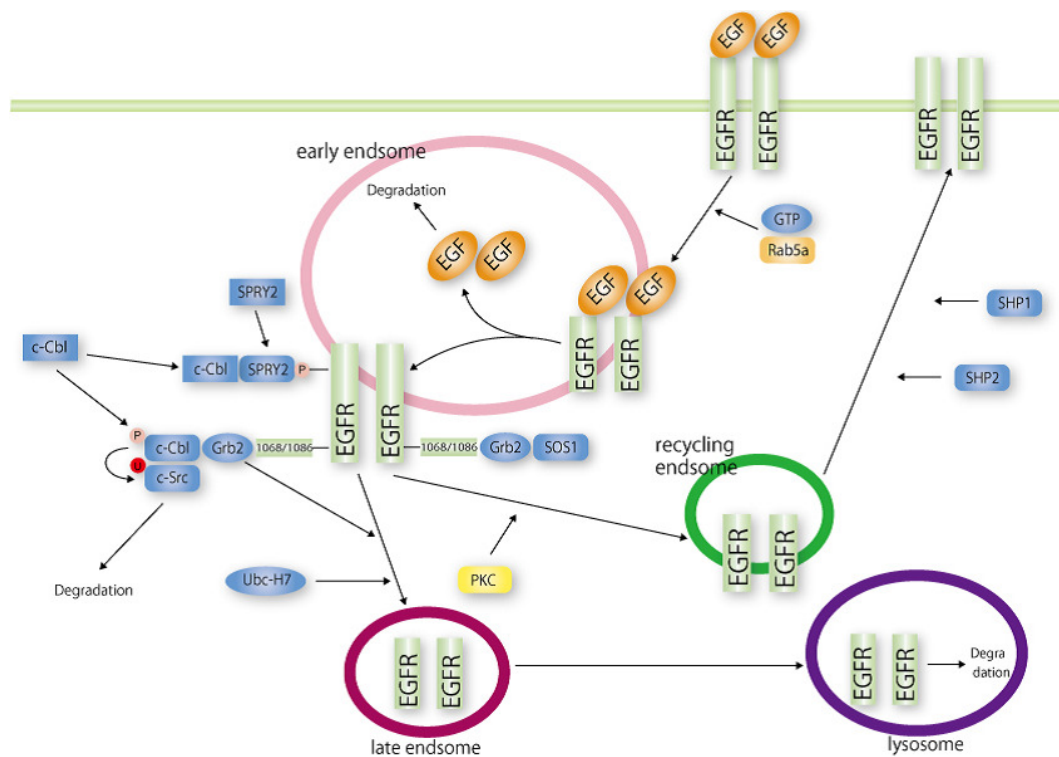

**Figure S1.** Phenomenon model of the endocytosis signaling pathway, which is obtained from Petri net pathways (<http://genome.ib.sci.yamaguchi-u.ac.jp/pnp/>).

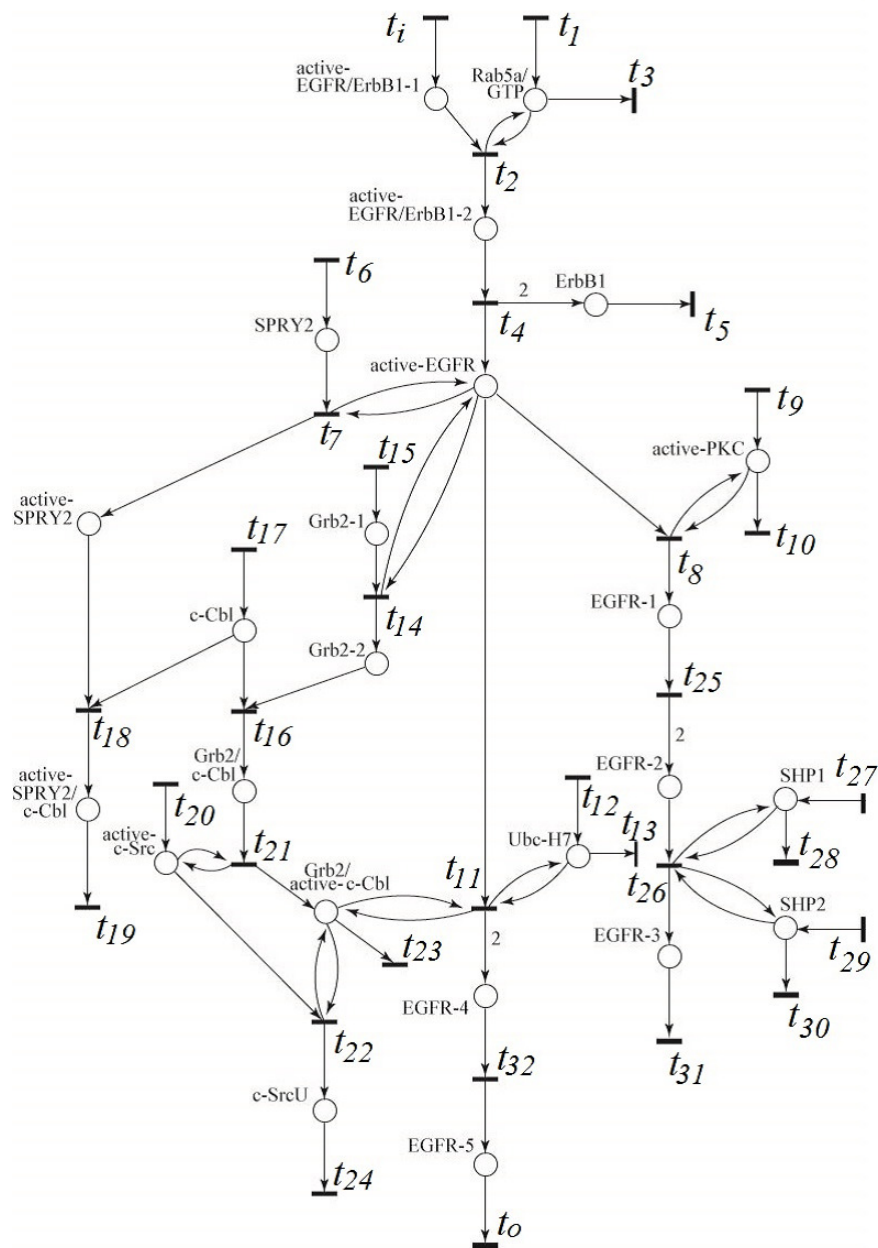

**Figure S2.** Original endocytosis Petri net model, to which Algorithm 1 is to be applied.

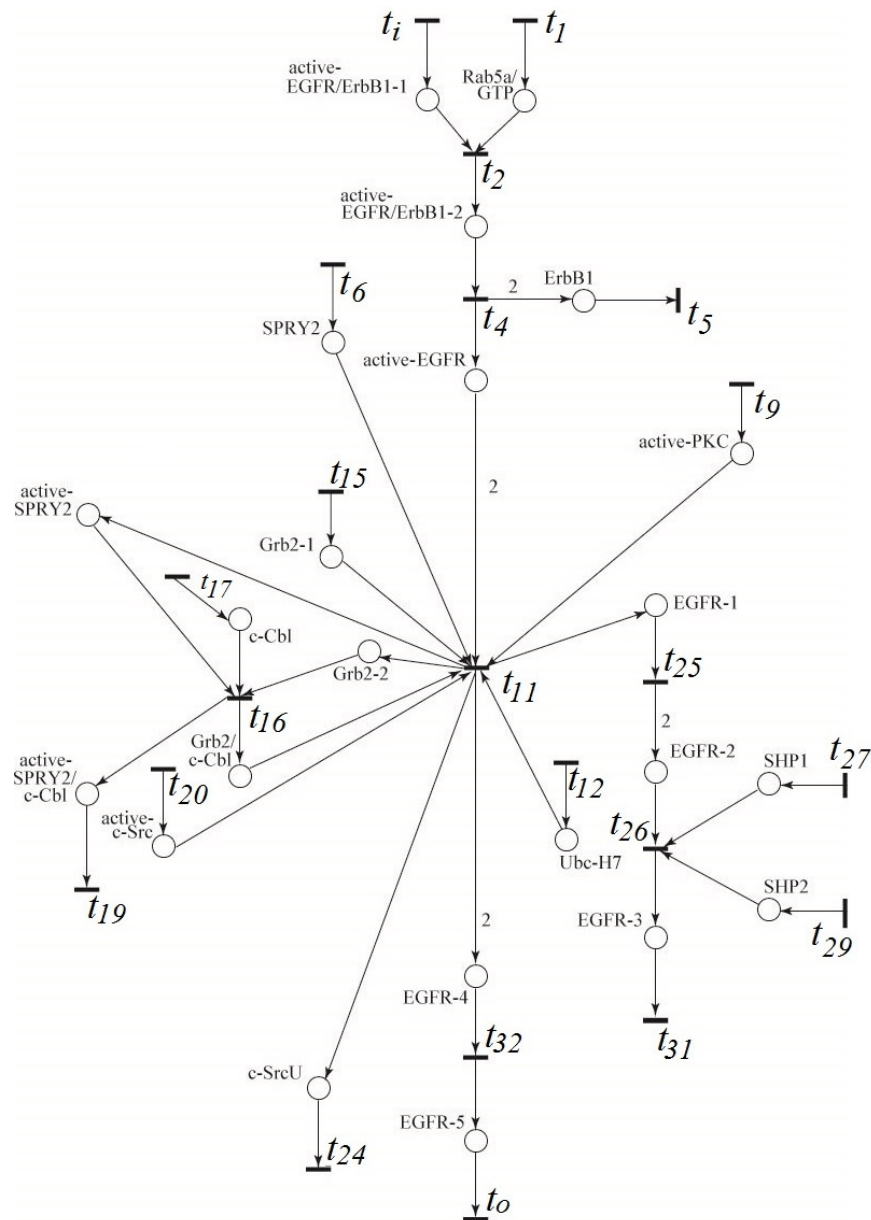

**Figure S3.** An intermediate net is obtained by shrinking all of the self-loops related to transitions,  $t_2$ ,  $t_7$ ,  $t_8$ ,  $t_{11}$ ,  $t_{14}$ ,  $t_{21}$ ,  $t_{22}$  and  $t_{26}$ , and all of the conflict structures related to transition sets,  $\{t_2, t_3\}$ ,  $\{t_7, t_8, t_{11}, t_{14}\}$ ,  $\{t_8, t_{10}\}$ ,  $\{t_{11}, t_{13}\}$ ,  $\{t_{16}, t_{18}\}$ ,  $\{t_{11}, t_{22}, t_{23}\}$ ,  $\{t_{21}, t_{22}\}$ ,  $\{t_{26}, t_{28}\}$  and  $\{t_{26}, t_{30}\}$ . As a result,  $t_3$ ,  $t_7$ ,  $t_8$ ,  $t_{10}$ ,  $t_{13}$ ,  $t_{14}$ ,  $t_{18}$ ,  $t_{21}$ ,  $t_{22}$ ,  $t_{23}$ ,  $t_{28}$  and  $t_{30}$  are shrunk.

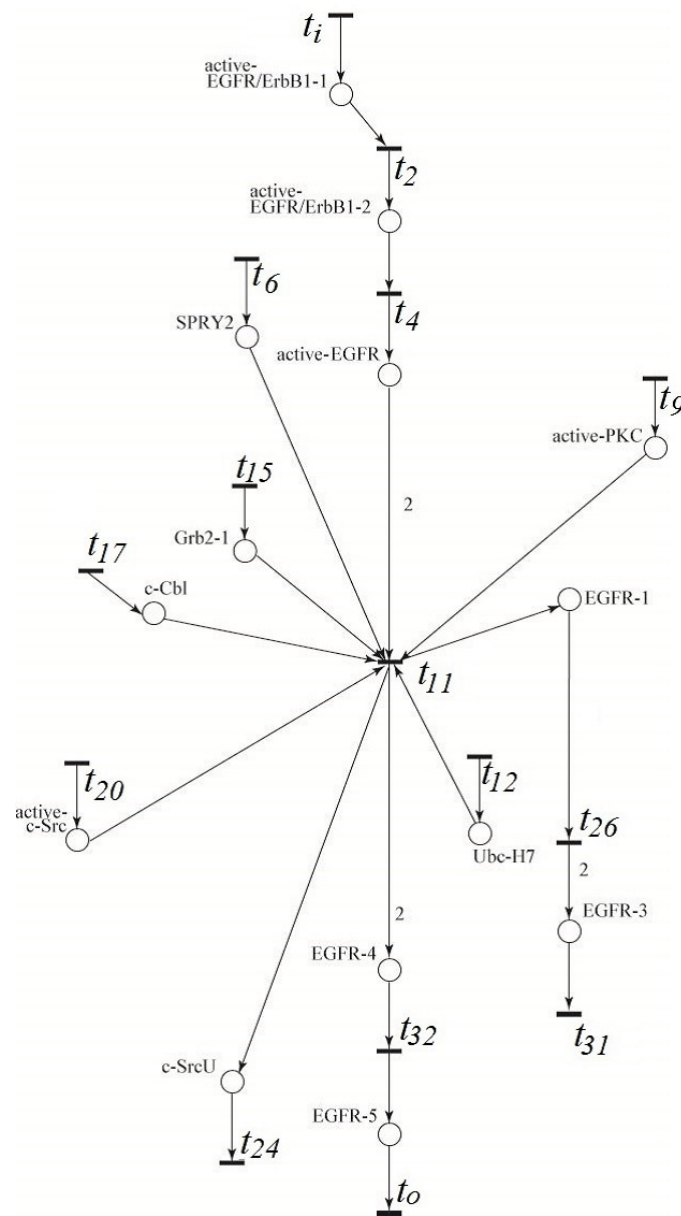

**Figure S4.** An intermediate net is obtained by processing single-input single-output structure related to places, Rab5a/GTP, ErbB1, active-SPRY2, Grb2-2, Grb2/c-Cbl, active-SPRY2/c-Cbl, EGFR-2, SHP1 and SHP2, and as a result,  $t_1$ ,  $t_5$ ,  $t_{16}$ ,  $t_{19}$ ,  $t_{25}$ ,  $t_{27}$  and  $t_{29}$  are shrunk.

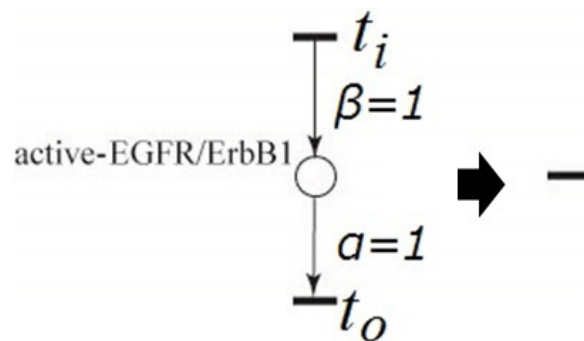

**Figure S5.** The resultant nets of the final and one step before.
